# Supplementary material for: Global Prediction of Tissue-Specific Gene Expression and Context-Dependent Gene Networks in Caenorhabditis elegans
Source: PLoS Comput Biol. 2009 Jun 19;5(6):e1000417. doi: 10.1371/journal.pcbi.1000417 (PMC2692103; doi:10.1371/journal.pcbi.1000417)
Supplement: Figure S2 — All miRNA target tissue interactions as measured by a ranksum statistic significant at 0.01. Numbers inside the cells represent how many target prediction sets gave a significant result (out of 3, Mirna, Pictar, Targetscan). When multiple target sets give significant results the ranksum statistic is averaged. “D” signifies that multiple target prediction sets gave significant results but disagreed in the direction. (0.04 MB PDF) [file pcbi.1000417.s002.pdf]

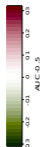

| neurons | germ-line | intestine | hypodermis | muscle | pharynx |            |
|---------|-----------|-----------|------------|--------|---------|------------|
|         |           |           | 1          | 2      | 2       | mi R-232   |
|         |           |           | 1          | 1      | 1       | mi R-79    |
|         |           |           | 1          | 2      | 1       | mi R-72    |
|         |           |           | 1          | 2      | 1       | mi R-44    |
|         |           |           | 1          | 2      | 1       | mi R-228   |
| 1       |           |           | 1          | 1      | 2       | mi R-60    |
| 1       |           |           | 1          | 1      | 1       | mi R-265   |
|         |           |           |            | 2      | 1       | mi R-49    |
|         |           |           |            | 1      | 1       | mi R-75    |
|         |           |           |            | 1      | 1       | mi R-83    |
|         |           |           |            | 1      | 1       | mi R-247   |
|         |           |           |            | 1      | 1       | mi R-74    |
|         | 1         |           |            | 1      | 1       | mi R-243   |
|         |           | 1         |            | 1      | 2       | mi R-61    |
| 1       |           |           |            | 1      | 1       | mi R-67    |
| 1       |           |           |            | 1      | 1       | mi R-248.2 |
| 1       |           |           |            | 1      | 1       | mi R-250   |
|         | 2         |           | 1          | 1      | 2       | mi R-1     |
| 1       | 1         |           | 1          | 1      | 1       | mi R-54    |
| 1       | 1         |           | 1          |        | 1       | mi R-56    |
| 1       | 1         |           | 1          |        | 1       | mi R-55    |
| 1       | 1         |           | 1          |        | 1       | mi R-52    |
| 1       | 1         |           | 1          |        | 1       | mi R-53    |
|         | 1         | 1         |            |        |         | mi R-358   |
| 1       | 1         | 1         |            |        | D       | mi R-245   |
| 3       |           | 2         | 2          | 2      | 3       | mi R-2     |
| 1       |           | 1         | 3          | 3      | 3       | mi R-124   |
| 1       |           | 1         | 1          | 1      | 2       | mi R-43    |
| 1       |           | 1         | 1          | 1      | 1       | mi R-797   |
| 1       |           |           | 2          |        | 1       | mi R-244   |
|         |           |           | 1          |        | 1       | mi R-85    |
|         |           |           | 2          | 1      | 1       | mi R-785   |
| 1       |           |           | 1          | 1      | 1       | mi R-51    |
|         |           |           | 1          |        | 1       | mi R-248   |
|         |           |           |            |        | 1       | mi R-255   |
|         |           |           |            |        | 1       | mi R-45    |
|         |           |           |            |        | 2       | mi R-236   |
|         |           |           |            |        | 1       | mi R-249   |
|         |           |           |            |        | 1       | mi R-268   |
|         |           |           |            |        | 1       | mi R-246   |
| 1       | 1         |           |            |        | 1       | mi R-259   |
|         |           | 1         |            |        | 1       | mi R-87    |
| 2       |           | 1         |            | 2      | 2       | mi R-86    |
| 1       |           | 1         | 1          | 1      | 1       | mi R-90    |
|         |           | 3         | 1          | 1      | D       | mi R-238   |
| 1       |           | 2         |            | 1      | 2       | mi R-71    |
|         |           | 1         |            |        | 2       | mi R-58    |
|         |           | 1         |            |        |         | mi R-233   |
|         |           | 1         |            |        |         | mi R-356   |
|         |           |           |            | 1      |         | mi R-48    |
|         |           |           |            | 1      |         | mi R-84    |
|         |           |           |            | 1      |         | mi R-790   |
|         |           |           |            | 1      |         | mi R-34    |
|         | 1         |           |            | 1      |         | mi R-256   |
| 1       |           |           |            | 1      |         | mi R-241   |
|         | 1         |           |            | 2      |         | mi R-77    |
|         |           |           | 1          | 1      |         | let-7      |
|         |           |           | 1          |        |         | mi R-50    |
|         |           | 1         | 1          |        |         | mi R-230   |
|         |           | 1         | 1          |        |         | mi R-273   |
|         |           | 1         |            |        | 1       | mi R-267   |
|         |           | 1         |            |        |         | mi R-68    |
|         |           |           | 1          |        | 1       | mi R-1019  |
|         |           |           |            |        | 1       | mi R-799   |
|         |           |           |            |        | 1       | mi R-354   |
|         |           |           |            |        | 1       | mi R-237   |
|         |           |           |            |        | 1       | mi R-1020  |
|         |           |           |            |        | 1       | mi R-353   |
| 1       |           |           |            |        | 1       | mi R-258   |
| 1       |           |           |            |        |         | mi R-254   |
| 1       |           |           |            |        |         | mi R-46    |
| 1       |           |           |            |        |         | mi R-47    |
| 1       |           |           |            |        |         | mi R-234   |
| 1       |           |           |            |        |         | mi R-40    |
| 1       |           | 1         | 1          | 1      |         | mi R-82    |
| 1       |           | 1         | 1          | 1      |         | mi R-81    |
| 1       |           |           |            |        | 1       | mi R-792   |
| 1       |           |           | 1          |        | 1       | mi R-240   |
| 1       |           |           | 1          |        | 1       | mi R-253*  |
| 1       |           |           | 1          | 1      | 2       | mi R-798   |
| 1       |           |           | 1          | 1      | 1       | mi R-355   |
|         | 1         |           |            |        |         | mi R-257   |
|         | 1         |           |            |        |         | mi R-360   |
|         |           |           |            | 1      |         | mi R-260   |
|         |           |           |            | 1      | 1       | mi R-272   |
|         |           |           |            | 1      | 1       | lsy-6      |
| 1       |           |           |            | 1      | 1       | mi R-359   |
| 1       |           |           |            | 1      | 1       | mi R-57    |
| 1       |           |           |            | 1      | 2       | mi R-789   |
