# Supplementary material for: Global Prediction of Tissue-Specific Gene Expression and Context-Dependent Gene Networks in Caenorhabditis elegans
Source: PLOS journal article supplement (doi:10.1371/journal.pcbi.1000417), 2009-06-18
Supplement: S4 (10.1371/journal.pcbi.1000417.s004) [file journal.pcbi.1000417.s004]

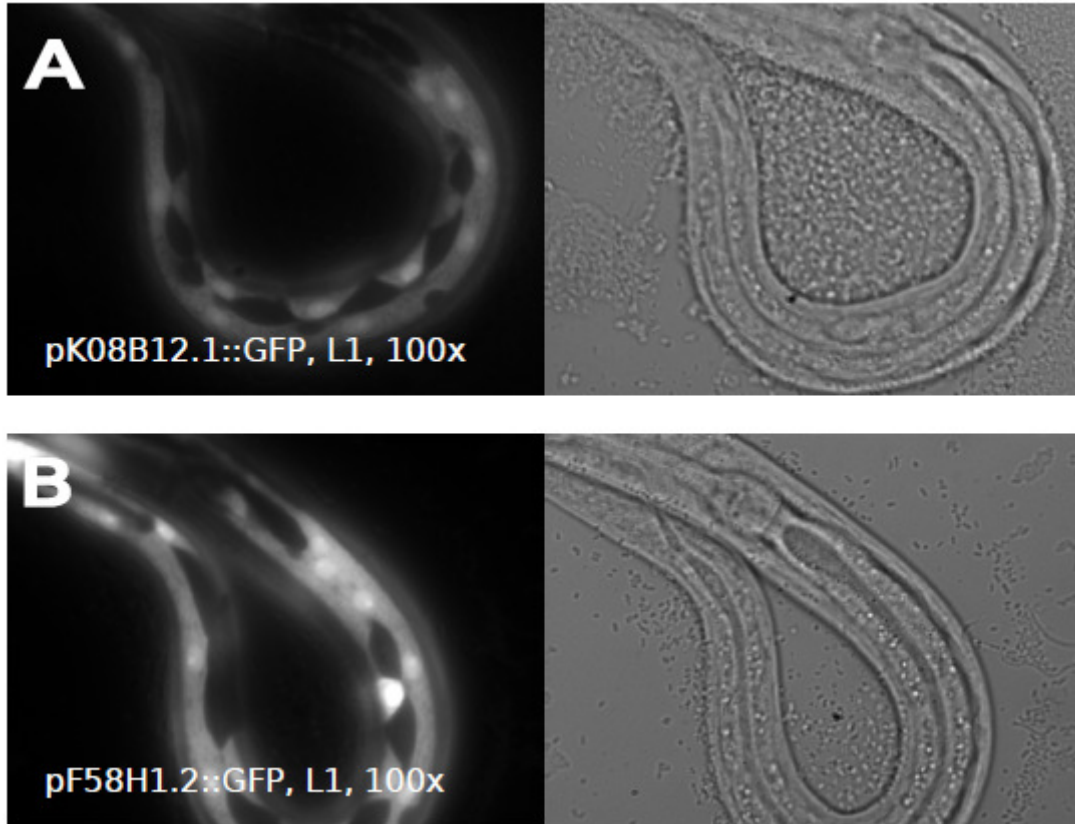

Additional imaged of strains expressing hypodermal GFP.
