# Supplementary material for: Global Prediction of Tissue-Specific Gene Expression and Context-Dependent Gene Networks in Caenorhabditis elegans
Source: PLoS Comput Biol. 2009 Jun 19;5(6):e1000417. doi: 10.1371/journal.pcbi.1000417 (PMC2692103; doi:10.1371/journal.pcbi.1000417)
Supplement: Table S1 — Comparison of area under precision-recall curve (corrected for base-line) between a correlation-based method (sum of correlations with known tissue-specific genes) and an SVM based method. (0.01 MB PDF) [file pcbi.1000417.s005.pdf]

|            | Correlation | SVM  | Fraction Improvement |
|------------|-------------|------|----------------------|
| germ line  | 0.12        | 0.23 | 1.92                 |
| neurons    | 0.05        | 0.16 | 3.14                 |
| intestine  | 0.06        | 0.18 | 3.10                 |
| muscle     | 0.12        | 0.23 | 1.92                 |
| hypodermis | 0.09        | 0.13 | 1.41                 |
| pharynx    | 0.15        | 0.20 | 1.33                 |

Table S1. Comparison of area under precision-recall curve (corrected for base-line) between a correlation-based method (sum of correlations with known tissue-specific genes) and an SVM based method.
